# Supplementary material
Source: MDPI journal article supplement (https://www.mdpi.com/2673-9976/27/1/46)
Supplement: s1 [file s1]

**Table S1.** Medium components used in the induction and regeneration medium.

| Medium<br>Components (mg L <sup>-1</sup> )          | Induction media |         | Regeneration medium |        |
|-----------------------------------------------------|-----------------|---------|---------------------|--------|
|                                                     | MS1             | MS2     | CHB-3               | CHB-3R |
| <i>Macronutrients</i>                               |                 |         |                     |        |
| KNO <sub>3</sub>                                    | 1900            | 1900    | 1415                | 1415   |
| (NH <sub>4</sub> ) <sub>2</sub> SO <sub>4</sub>     | -               | -       | 232                 | 232    |
| MgSO <sub>4</sub> ·7H <sub>2</sub> O                | 370             | 370     | 93                  | 93     |
| KH <sub>2</sub> PO <sub>4</sub>                     | 170             | 170     | 200                 | 200    |
| CaCl <sub>2</sub> ·2H <sub>2</sub> O                | 440             | 440     | 83                  | 83     |
| NH <sub>4</sub> NO <sub>3</sub>                     | 1650            | 1650    | -                   | -      |
| <i>Micronutrients</i>                               |                 |         |                     |        |
| FeSO <sub>4</sub> ·7H <sub>2</sub> O                | 27.8            | 27.8    | -                   | -      |
| FeNa <sub>2</sub> EDTA                              |                 |         | 40                  | 40     |
| Na <sub>2</sub> EDTA·2H <sub>2</sub> O              | 37.3            | 37.3    | -                   | -      |
| MnSO <sub>4</sub> ·5H <sub>2</sub> O                | 22.3            | 22.3    | 3.75                | 3.75   |
| ZnSO <sub>4</sub> ·7H <sub>2</sub> O                | 8.6             | 8.6     | 5                   | 5      |
| H <sub>3</sub> BO <sub>3</sub>                      | 100             | 100     | 5                   | 5      |
| KI                                                  | 0.8             | 0.8     | 0.4                 | 0.4    |
| CuSO <sub>4</sub> ·5H <sub>2</sub> O                | 0.025           | 0.025   | 0.025               | 0.025  |
| Na <sub>2</sub> MoO <sub>4</sub> ·2H <sub>2</sub> O | 0.25            | 0.25    | 0.012               | 0.012  |
| CoCl <sub>2</sub> ·6H <sub>2</sub> O                | 0.025           | 0.025   | 0.025               | 0.025  |
| <i>Vitamins</i>                                     |                 |         |                     |        |
| Nicotinic acid                                      | 0.5             | 0.5     | 0.5                 | 0.5    |
| Biotin                                              | -               | -       | 0.25                | 0.25   |
| Pyridoxine HCl                                      | 0.5             | 0.5     | 0.5                 | 0.5    |
| Thiamine HCl                                        | 0.4             | 0.4     | 2.5                 | 2.5    |
| Myo-inositol                                        | 100             | 100     | 0.39                | 0.39   |
| Pentthenate                                         | -               | -       | 0.25                | 0.25   |
| Glycine                                             | -               | -       | 1                   | 1      |
| Glutamine                                           | 146             | 146     | 1000                | 1000   |
| <i>Carbonhydrates</i>                               |                 |         |                     |        |
| Sucrose                                             | 40000           | 30000   | -                   | 30000  |
| Maltose                                             | -               | -       | 90000               | -      |
| <i>Growth regulators</i>                            |                 |         |                     |        |
| 2,4-D                                               | -               | -       | 2                   | -      |
| Kinetin                                             | -               | -       | 2                   | 0.5    |
| NAA                                                 | 4               | 4       | -                   | 0.5    |
| BAP                                                 | 0.5             | 0.5     | -                   | 1      |
| <i>Other suplements</i>                             |                 |         |                     |        |
| AgNO <sub>3</sub>                                   | 15              | 15      | -                   | -      |
| Activated carbon                                    | (0.25%)         | (0.25%) | -                   | -      |
| <i>Solidifying agents</i>                           |                 |         |                     |        |
| Gelrite                                             | -               | -       | -                   | 2800   |
| Agar                                                | 7000            | 7000    | -                   | -      |
| pH                                                  | 5.9             | 5.9     | 5.9                 | 5.9    |
